# Supplementary material for: Methotrexate Disposition, Anti-Folate Activity, and Metabolomic Profiling to Identify Molecular Markers of Disease Activity and Drug Response in the Collagen-Induced Arthritis Mouse Model
Source: MDPI journal article supplement (doi:10.3390/metabo12010024), 2021-12-28
Supplement: s1 [file s1]

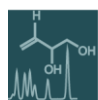

## Supplemental Materials:

**Table S1.** Data corresponding from volcano plots showing metabolites that were significantly different ( $q < 0.05$ ) between control (con) and disease (dis) mice.

| Con v. Dis                      |      |                |                       |  |
|---------------------------------|------|----------------|-----------------------|--|
| Compound                        | FC   | <i>q</i> Value | Raw <i>p</i> Value    |  |
| PI 36:1                         | 0.37 | 0.0019         | 3.11x10 <sup>-6</sup> |  |
| CE 16:1                         | 1.74 | 0.0019         | 7.11x10 <sup>-6</sup> |  |
| PI 36:2                         | 0.48 | 0.0019         | 7.28x10 <sup>-6</sup> |  |
| PI 38:2                         | 0.52 | 0.0019         | 8.98x10 <sup>-6</sup> |  |
| Trimethylammonium               | 0.58 | 0.0019         | 9.43x10 <sup>-6</sup> |  |
| PI 35:2; PI 17:1-18:1;          | 0.52 | 0.0019         | 1.11x10 <sup>-6</sup> |  |
| TAG 66:18                       | 2.34 | 0.0037         | 2.53x10 <sup>-5</sup> |  |
| CE 22:6                         | 1.91 | 0.0058         | 4.94x10 <sup>-5</sup> |  |
| PI 34:1                         | 0.54 | 0.0058         | 5.19x10 <sup>-5</sup> |  |
| 4-Trimethylammoniobutanoic acid | 0.62 | 0.0065         | 6.44x10 <sup>-5</sup> |  |
| PI 36:3                         | 0.65 | 0.0065         | 7.02x10 <sup>-5</sup> |  |
| PI 34:2                         | 0.65 | 0.0072         | 8.51x10 <sup>-5</sup> |  |
| TAG 62:13                       | 1.83 | 0.010          | 0.00014               |  |
| PE-Cer d40:1                    | 1.71 | 0.010          | 0.00014               |  |
| PI 38:6                         | 0.73 | 0.013          | 0.00020               |  |
| PE 40:7                         | 1.48 | 0.015          | 0.00025               |  |
| TAG 53:2                        | 0.69 | 0.015          | 0.00027               |  |
| N-Methylisoleucine              | 1.88 | 0.015          | 0.00027               |  |
| PI 35:1                         | 0.60 | 0.015          | 0.00029               |  |
| SM d40:2                        | 1.32 | 0.015          | 0.00030               |  |
| PI 37:2                         | 0.51 | 0.018          | 0.00038               |  |
| TAG 51:1                        | 0.66 | 0.024          | 0.00053               |  |
| SM d38:1                        | 1.31 | 0.024          | 0.00055               |  |
| TAG 60:12 A                     | 1.74 | 0.024          | 0.00059               |  |
| TAG 60:12 B                     | 1.72 | 0.024          | 0.00060               |  |
| PI 35:2                         | 0.62 | 0.024          | 0.00063               |  |
| Phenylacetyl glycine            | 1.84 | 0.027          | 0.00073               |  |
| TAG 52:6                        | 0.59 | 0.029          | 0.00088               |  |
| SM d39:1                        | 1.19 | 0.029          | 0.00091               |  |
| PI 36:2                         | 0.66 | 0.029          | 0.00093               |  |
| TAG 49:1                        | 0.66 | 0.029          | 0.00093               |  |
| LPE 38:6                        | 0.59 | 0.029          | 0.00094               |  |
| ethanolamine                    | 1.43 | 0.029          | 0.0010                |  |
| SM d40:1                        | 1.33 | 0.029          | 0.0010                |  |
| TAG 51:2                        | 0.63 | 0.029          | 0.0010                |  |
| PC 42:10                        | 1.33 | 0.029          | 0.0010                |  |
| TAG 62:14                       | 1.74 | 0.029          | 0.0011                |  |
| SM d42:5                        | 1.20 | 0.029          | 0.0011                |  |
| PC 40:2e                        | 0.54 | 0.029          | 0.0011                |  |
| Sclareolide                     | 0.53 | 0.030          | 0.0012                |  |
| Cer-NP t40:0                    | 0.53 | 0.033          | 0.0014                |  |

---

|                        |      |       |        |
|------------------------|------|-------|--------|
| TAG 60:11              | 1.47 | 0.033 | 0.0014 |
| PC 40:7                | 1.27 | 0.033 | 0.0014 |
| PI 32:0                | 0.55 | 0.035 | 0.0015 |
| TAG 49:2               | 0.55 | 0.038 | 0.0017 |
| Cer-NP t41:0           | 0.46 | 0.038 | 0.0017 |
| PI 38:5                | 1.33 | 0.040 | 0.0019 |
| LPE 34:0               | 0.55 | 0.045 | 0.0021 |
| PC p-42:4              | 0.79 | 0.046 | 0.0022 |
| TAG 51:3               | 0.61 | 0.046 | 0.0023 |
| lyxose                 | 0.42 | 0.049 | 0.0025 |
| pseudo uridine         | 1.40 | 0.049 | 0.0026 |
| TAG 53:3               | 0.66 | 0.049 | 0.0026 |
| .alpha.,.beta.-Thujone | 0.56 | 0.049 | 0.0026 |
| PE 34:2e               | 0.60 | 0.049 | 0.0027 |

---

**Table S2.** Data corresponding from volcano plots showing metabolites that were significantly different ( $q < 0.05$ ) between disease (dis) and disease mice treated with MTX (dis+MTX).

| Dis v. Dis+MTX             |      |                       |                       |
|----------------------------|------|-----------------------|-----------------------|
| Compound                   | FC   | <i>q</i> Value        | Raw <i>p</i> Value    |
| N,N-Diethyl-2-aminoethanol | 0.32 | 1.46x10 <sup>-6</sup> | 1.45x10 <sup>-9</sup> |
| N-Methylisoleucine         | 0.33 | 1.12x10 <sup>-5</sup> | 2.21x10 <sup>-8</sup> |
| PI 40:6                    | 1.51 | 0.0071                | 2.10x10 <sup>-5</sup> |
| PI 40:7                    | 1.69 | 0.0078                | 3.09x10 <sup>-5</sup> |
| PI 38:6                    | 1.39 | 0.0090                | 4.45x10 <sup>-5</sup> |
| PC 37:5                    | 1.60 | 0.010                 | 6.55x10 <sup>-5</sup> |
| PC 38:5                    | 1.30 | 0.010                 | 6.80x10 <sup>-5</sup> |
| PC 42:10                   | 1.49 | 0.010                 | 8.09x10 <sup>-5</sup> |
| PC 40:7                    | 1.32 | 0.011                 | 0.00010               |
| PC p-42:4; or PC o-42:5    | 1.32 | 0.012                 | 0.00012               |
| PC 40:8                    | 1.28 | 0.021                 | 0.00023               |
| PC 39:4                    | 1.40 | 0.024                 | 0.00029               |
| TAG 54:3e                  | 2.01 | 0.035                 | 0.00045               |
| PC 39:5                    | 1.31 | 0.035                 | 0.00048               |
| LPC 20:5                   | 1.40 | 0.039                 | 0.00058               |
| DG 36:4                    | 0.70 | 0.040                 | 0.00064               |
| PC 38:2                    | 1.25 | 0.040                 | 0.00067               |
| PC 37:4                    | 1.28 | 0.042                 | 0.00075               |
| PC 38:6                    | 1.15 | 0.044                 | 0.00083               |
| PI 38:6                    | 1.46 | 0.045                 | 0.00088               |

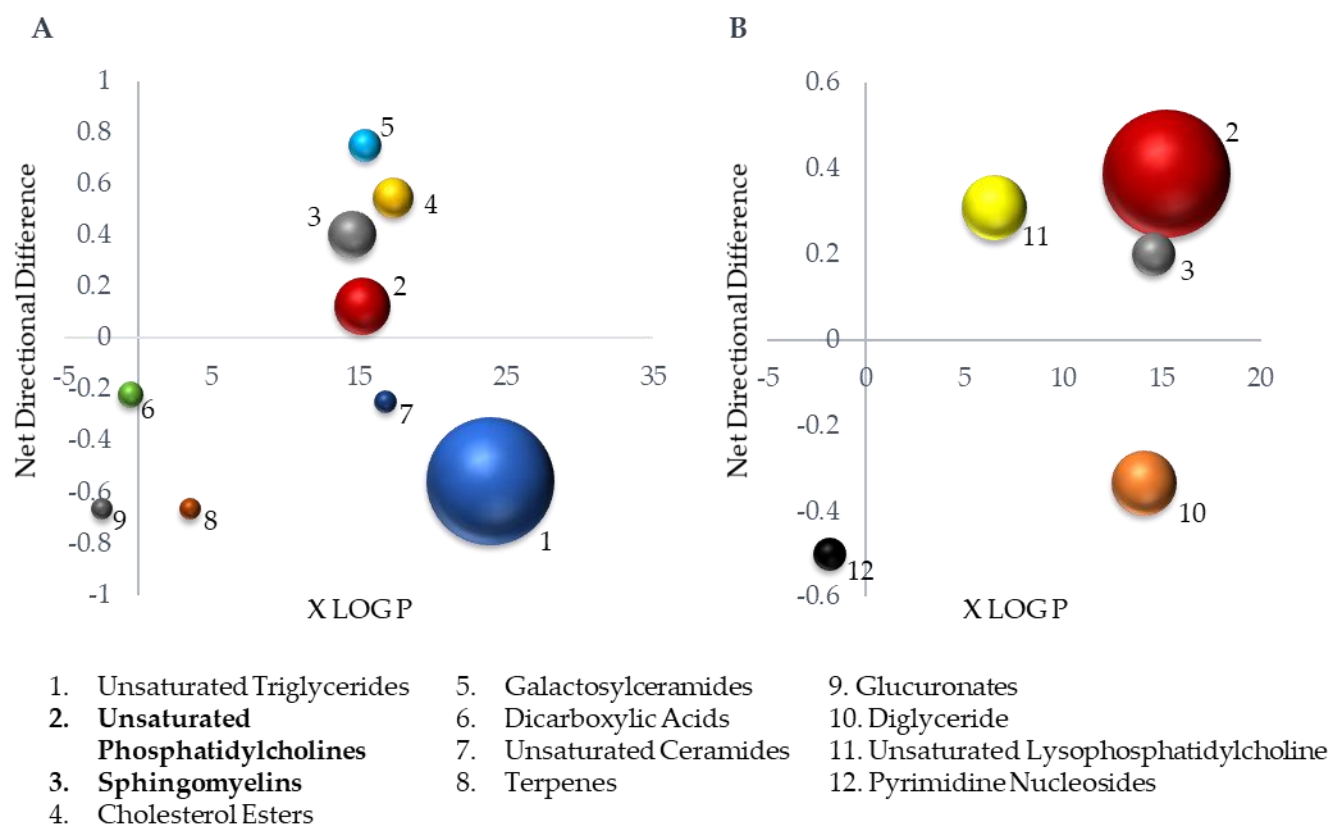

**Figure S1.** Chemometric network mapping and metabolomic enrichment data was analyzed using ChemRICH software which produced nonoverlapping chemical group classifications that mapped 1012 metabolites to 68 nonoverlapping chemical classes. **(A)** Metabolomic changes associated with CIA disease induction where compared to healthy control mice. Of these 68 classes differentiating control and CIA mice, 9 were found to be statistically significant ( $p < 0.05$ ). **(B)** Metabolomic differences associated with disease mice treated with MTX, compared to untreated CIA disease mice. Of these classes differentiating CIA mice and MTX treated CIA mice, 5 were found to be statistically significant ( $p < 0.05$ ). Each group of chemicals was assessed based on lipophilicity and fractional directional change. Node size of each cluster was directly proportional to the negative log of the  $p$  value for each class.

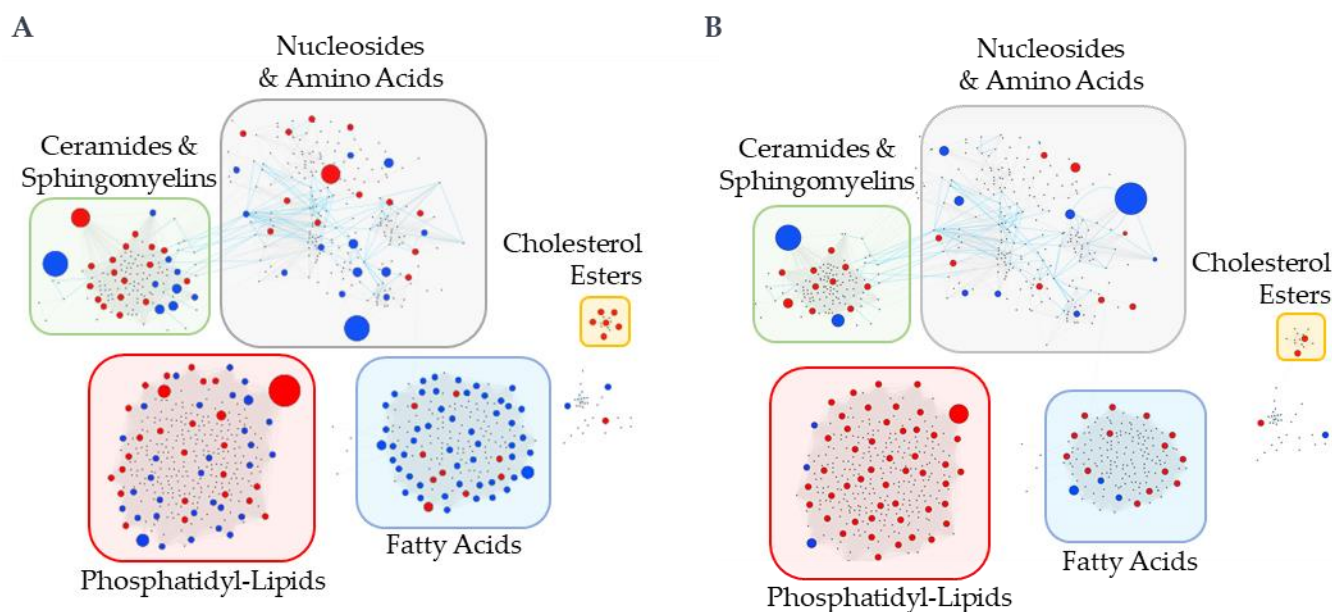

**Figure S2.** Metabolic network maps were built with MetaMapp 2020 and visualized using Cytoscape 3.8.4. The metabolic networks were organized into clusters using the community cluster tool and labeled by metabolite class. Red colored nodes represent metabolites that were found to significantly increase, and blue nodes represent metabolites that were found to be significantly decreased. Node size was directly proportional to measured fold-change. (A) induction of CIA vs control (B) MTX treatment in CIA mice vs untreated CIA mice.
